# Supplementary material
Source: PubMed Central journal article supplement (PMC5474477)
Supplement: NIHMS865388-supplement-supplement_1.pdf [file NIHMS865388-supplement-supplement_1.pdf]

Supplementary Material

[Click here to download Supplementary Material: Supplementary Fig S1.tif](#)

Supplementary Material

[Click here to download Supplementary Material: Supplementary Fig S2.tif](#)
